# Supplementary material for: Carbon, nitrogen, and phosphorus stoichiometry of organic matter in Swedish forest soils and its relationship with climate, tree species, and soil texture
Source: Copernicus journal article supplement (doi:10.5194/bg-2021-346), 2021-12-22
Supplement: Supplementary file 1 [file bg-2021-346-supplement.pdf]

# Carbon, nitrogen, and phosphorus stoichiometry of organic matter in Swedish forest soils and its relationship with climate, tree species, and soil texture

Marie Spohn<sup>1</sup>, Johan Stendahl<sup>1</sup>

<sup>1</sup>Department of Soil and Environment, Swedish University of Agricultural Sciences (SLU), Lennart Hjelms väg 9, P.O. Box 7014, 75007 Uppsala, Sweden

Correspondence to: Marie Spohn ([marie.spohn@slu.se](mailto:marie.spohn@slu.se))

## Supplement

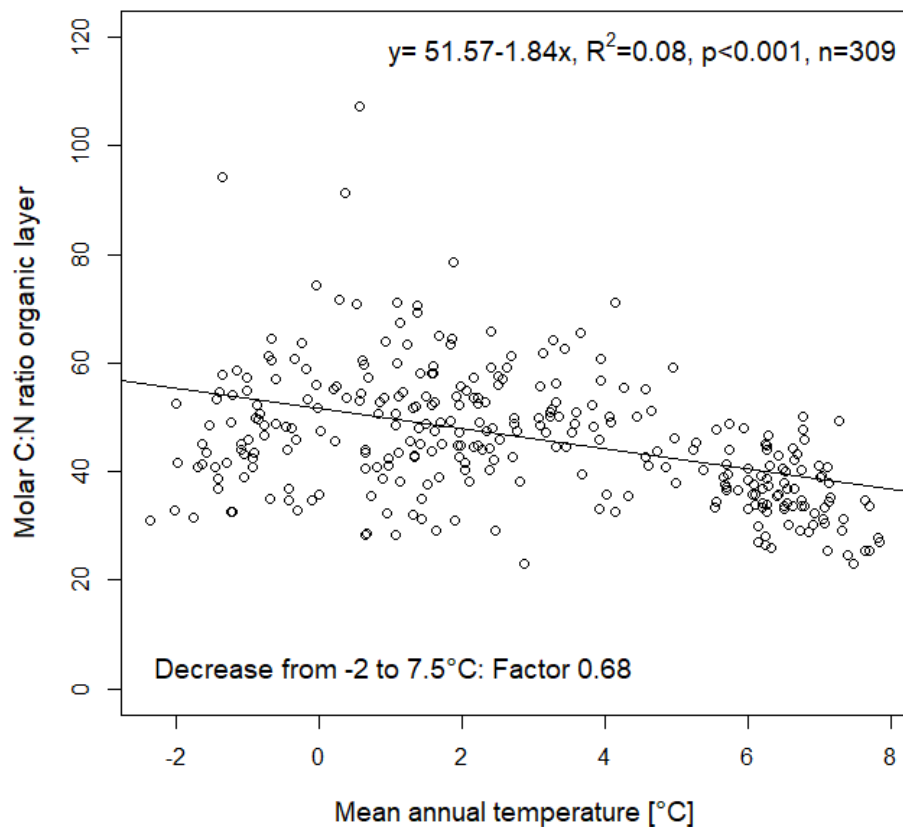

**Figure S1:** The carbon-to-nitrogen (C:N) ratio of the organic layer as a function of the mean annual temperature in 309 Swedish forests

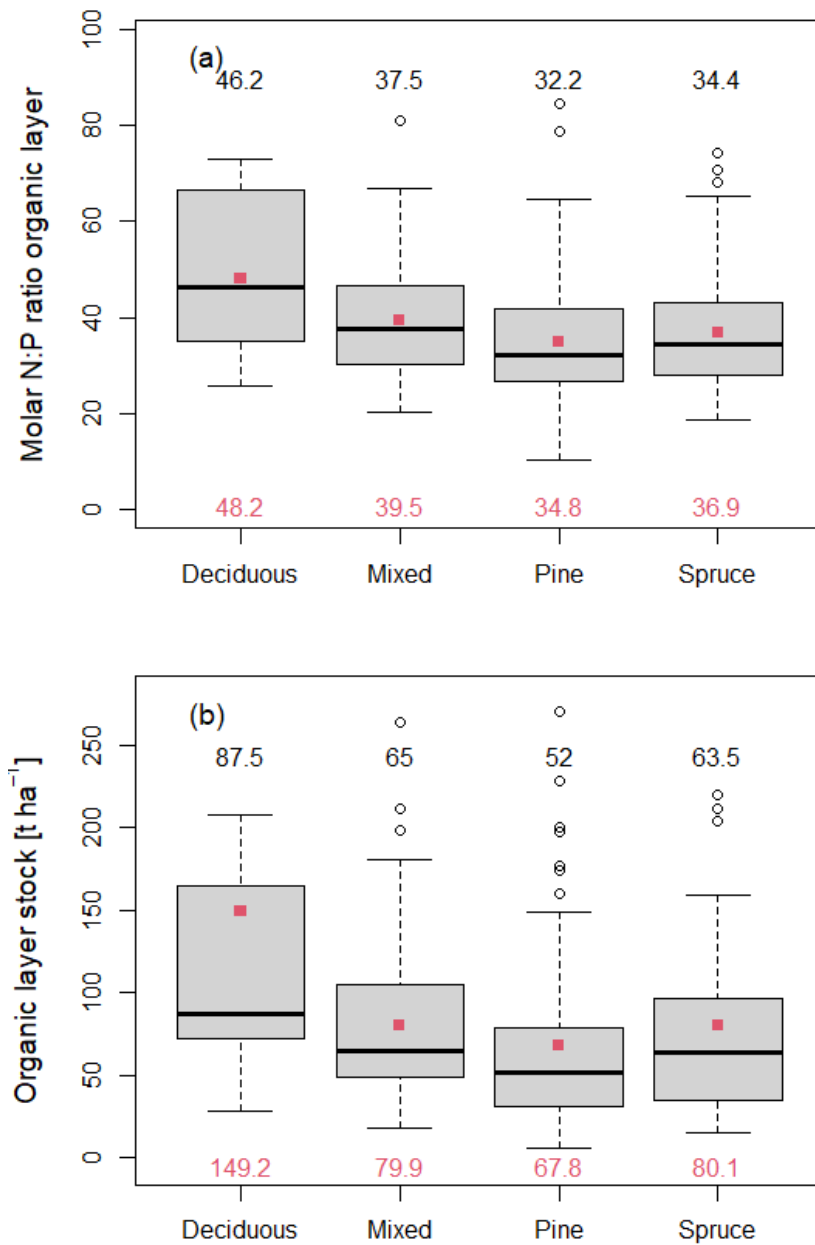

**Figure S2:** The molar N:P ratio of the organic layer (a) and the total mass of the organic layer (b) in 309 Swedish forest soils depending on the dominant tree species (deciduous n= 10, mixed n=67, pine n=144, and spruce n=88). Black numbers give the median, red dots and red numbers depict the arithmetic mean.

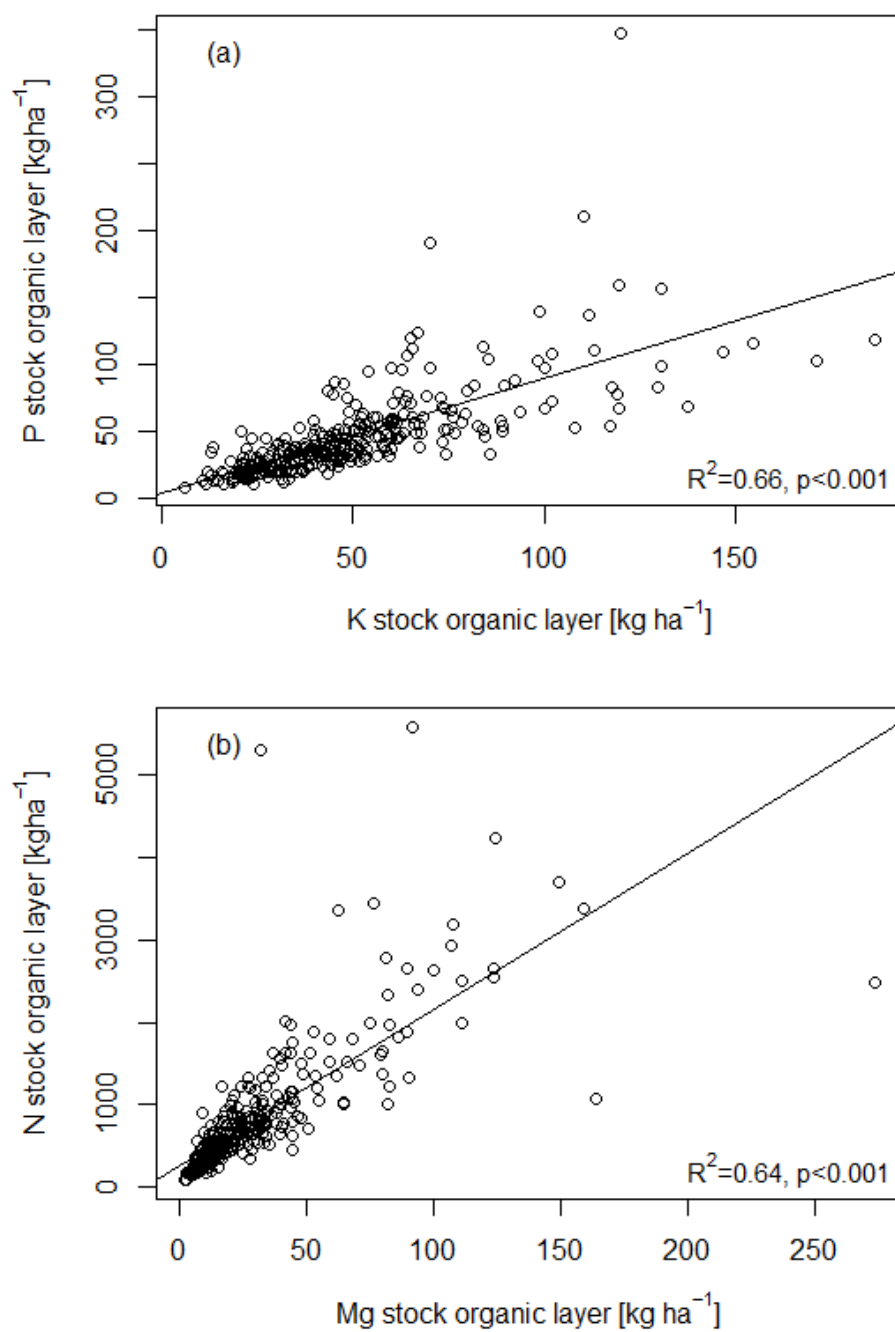

**Figure S3:** Correlation of the P and K stocks (a) and the N and the Mg stocks (b) of the organic layer in 309 Swedish forests.

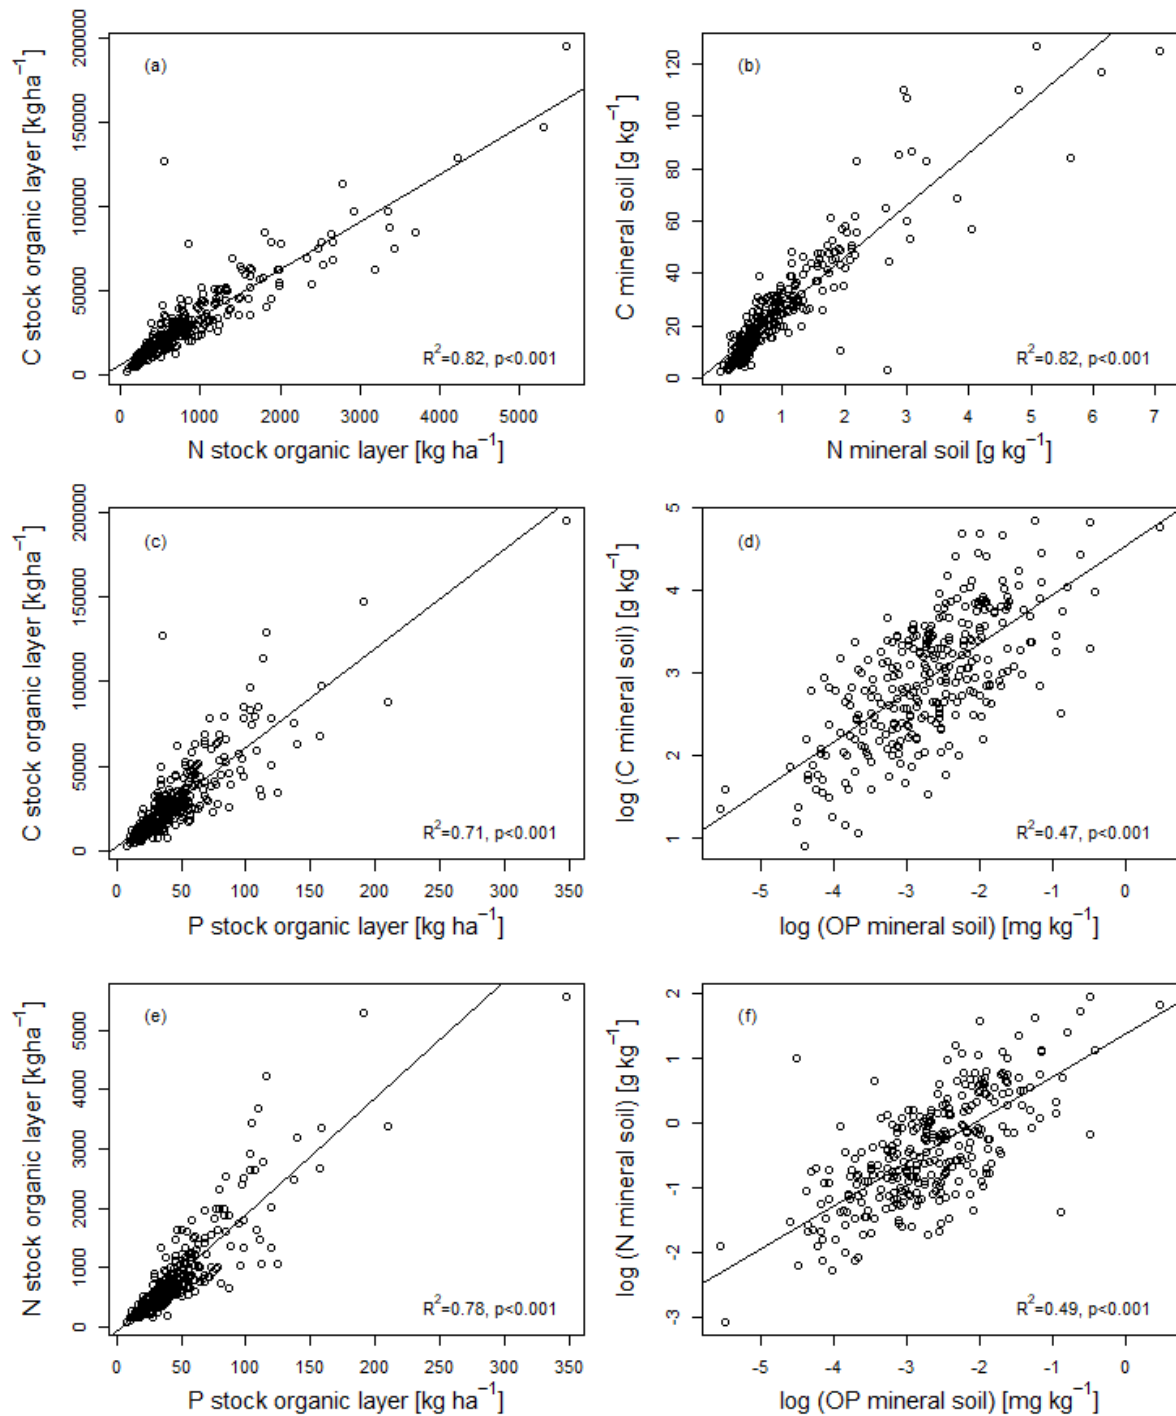

**Figure S4:** Correlations of the carbon (C) and nitrogen (N) stocks of the organic layer (a) and the C and N concentrations in the mineral soil in 0-10 cm as well as the correlation of the C and phosphorus (P) stocks of the organic layer (c) and the log transformed C and organic P (OP) concentrations of the mineral soil (d) together with the correlation of the N and P stocks of the organic layer (e) and the log transformed N and OP concentrations in the mineral soil in 0-10 cm depth ( $n=309$ ).

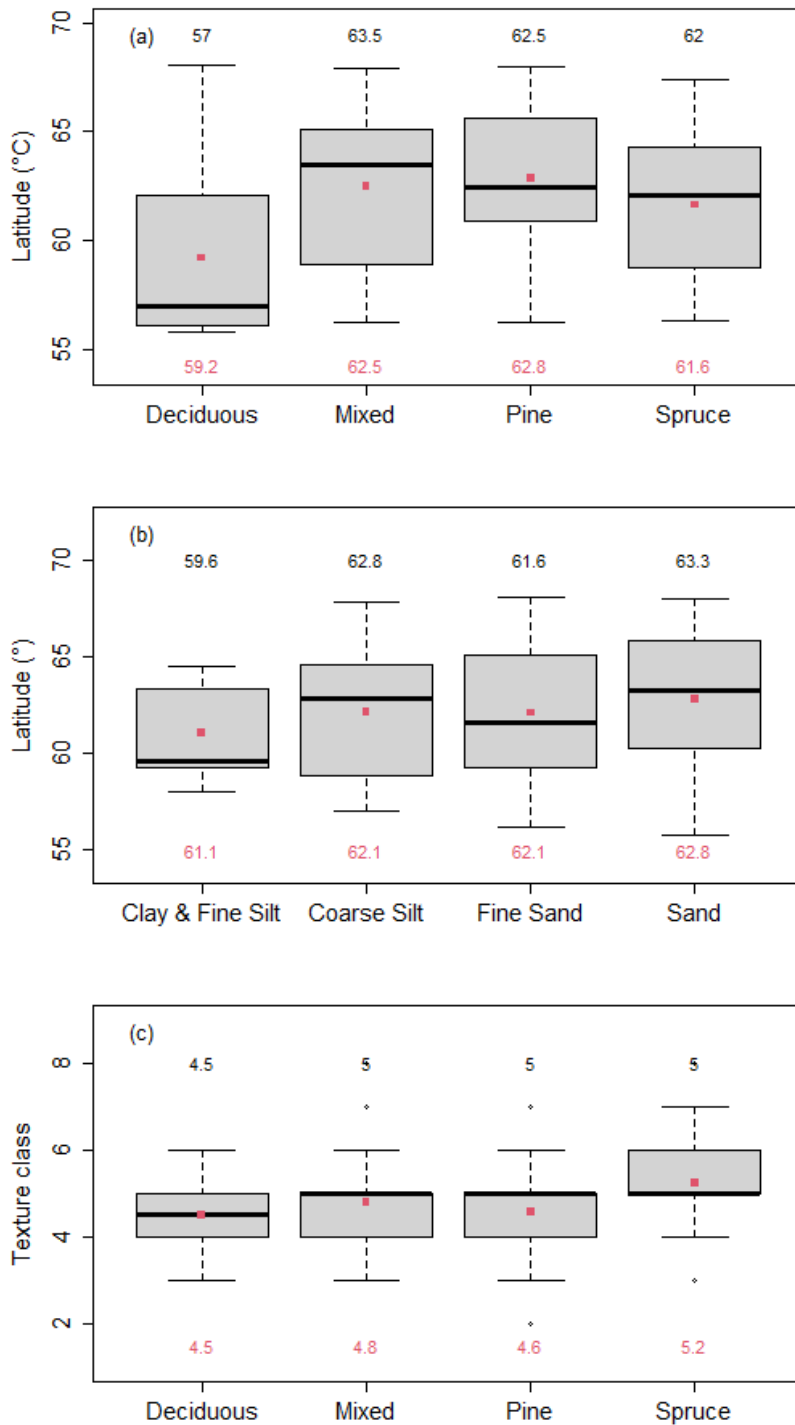

**Figure S5:** Latitude of forests with different dominant tree species (a; deciduous n= 10, mixed n=67, pine n=144, and spruce n=88), latitude of forests with different soil texture (b; clay and fine silt n=11, coarse silt n=52, fine sand n=136, and sand n=110), and texture class of forests with different dominant tree species (c). The texture classes are; clay (8), fine silt (7), coarse silt (6), fine sand (5), sand (4), and coarse sand (3).
